# Supplementary material
Source: PubMed Central journal article supplement (PMC3827948)

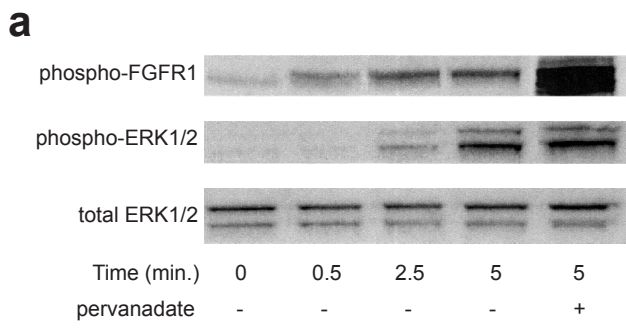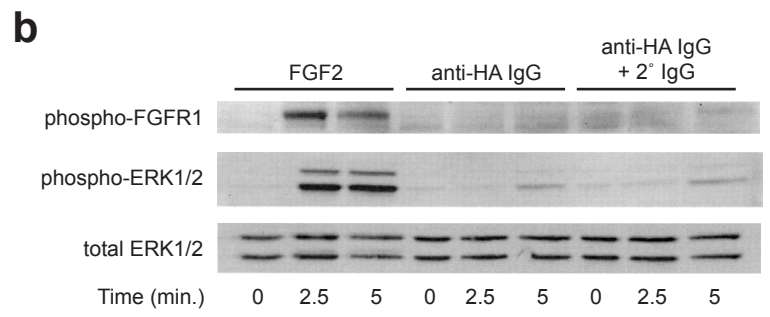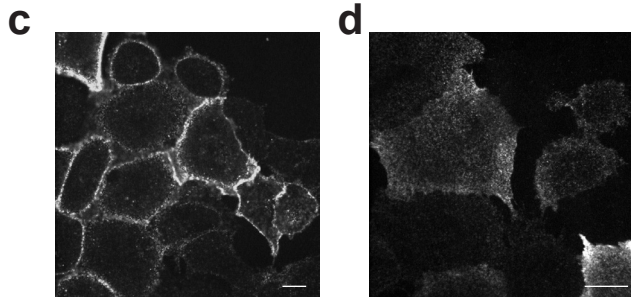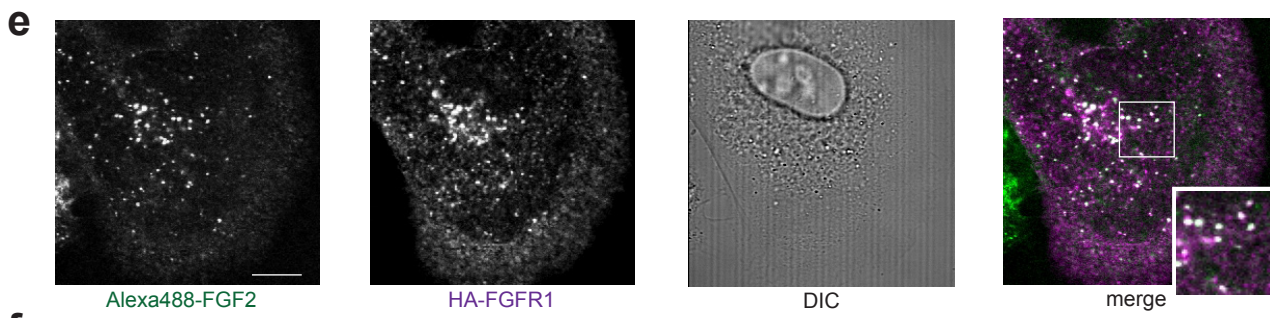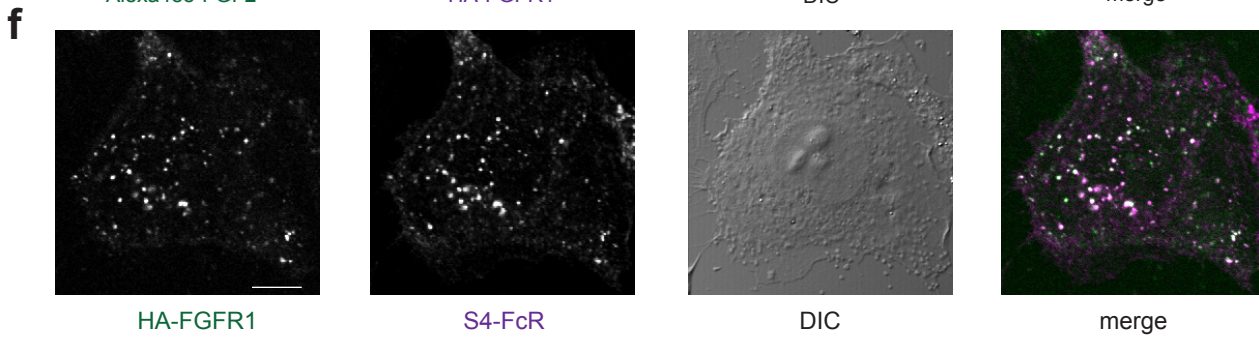

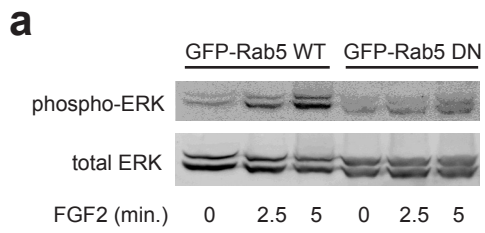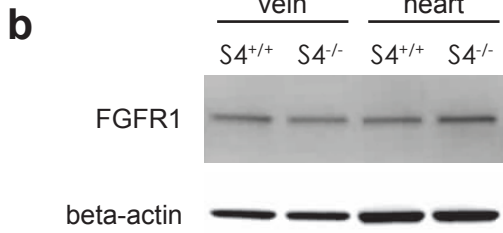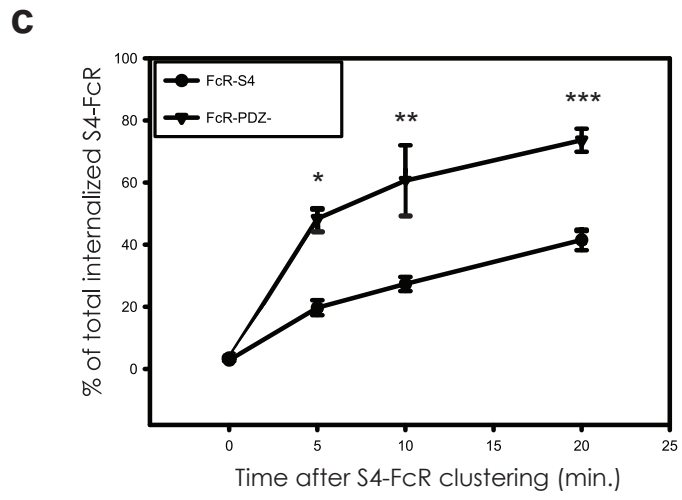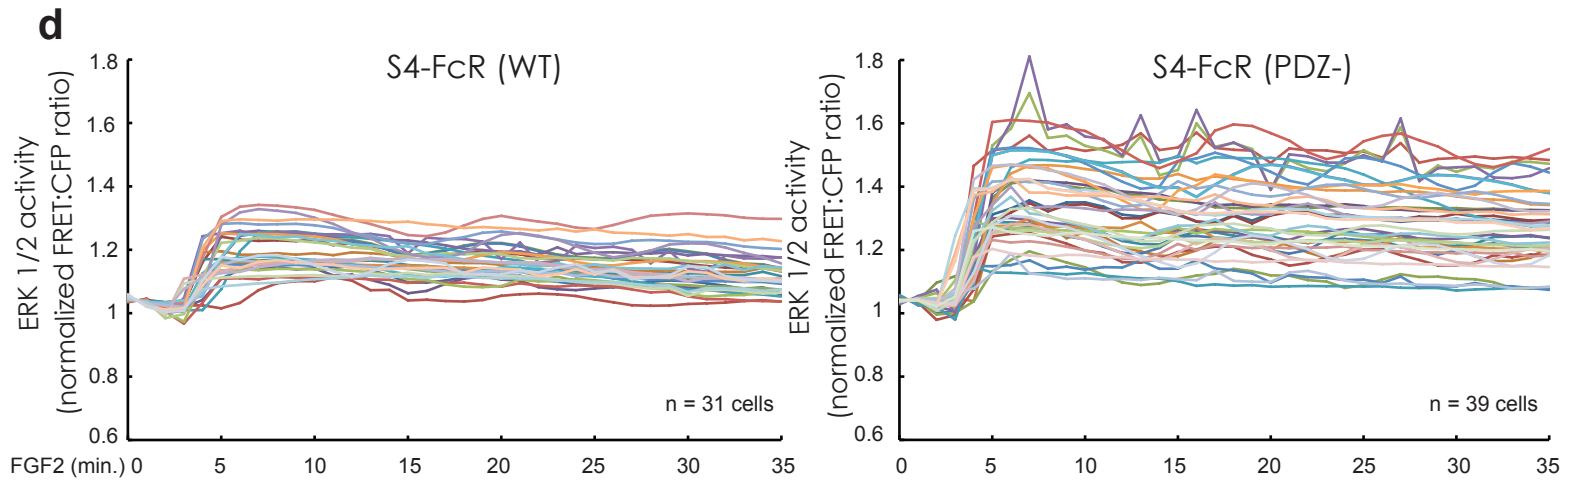

Supplement: NIHMS494905-supplement-Supl_figures.pdf [file NIHMS494905-supplement-Supl_figures.pdf]
